# Supplementary material for: Distributional Response of the Rare and Endangered Tree Species Abies chensiensis to Climate Change in East Asia
Source: MDPI journal article supplement (doi:10.3390/biology11111659), 2022-11-13
Supplement: s1 [file s1]

**Table S2.** Percent contribution of each environmental variable.

|                        | <b>Period</b> | <b>Bio4</b> | <b>Bio5</b> | <b>Bio11</b> | <b>Bio12</b> | <b>Bio15</b> | <b>Bio19</b> |
|------------------------|---------------|-------------|-------------|--------------|--------------|--------------|--------------|
| Percent contribution   | Current       | 8.7         | 13.6        | 40.5         | 21.1         | 11.8         | 4.3          |
| Permutation importance |               | 3.3         | 6.9         | 58.5         | 15.9         | 11.6         | 3.7          |
